# Supplementary material for: Applying band gap engineering to tune the linear optical and nonlinear optical properties of noncentrosymmetric chalcogenides La4Ge3SexS12−x (x = 0, 2, 4, 6, 8, 10)
Source: Royal Society of Chemistry journal article supplement (doi:10.1039/d1qi00879j), 2021-01-01
Supplement: d1qi00879j1.pdf [file d1qi00879j1.pdf]

# Applying Band Gap Engineering to Tune Linear Optical and Nonlinear Optical Properties of Noncentrosymmetric Chalcogenides $\text{La}_4\text{Ge}_3\text{Se}_x\text{S}_{12-x}$ ( $x = 0, 2, 4, 6, 8, 10$ )

Gary Cicirello <sup>a</sup>, Kui Wu <sup>b</sup>, *Bing Bing Zhang* <sup>b\*</sup>, Jian Wang <sup>a\*</sup>

<sup>a</sup>Department of Chemistry and Biochemistry, Wichita State University, Wichita, Kansas, 67260, United States

<sup>b</sup> College of Chemistry and Environmental Science, Hebei University, Key Laboratory of Analytical Science and Technology of Hebei Province, Baoding 071002, China

## Supporting Information

1. **Table S1.** Selected crystal data and unit cell parameters for  $\text{La}_4\text{Ge}_3\text{Se}_x\text{S}_{12-x}$  ( $x = 0, 2, 4, 6, 8, 10$ ) (Page 4)
2. **Table S2.** Refined atomic coordinates and isotropic displacement parameters for  $\text{La}_4\text{Ge}_3\text{Se}_x\text{S}_{12-x}$  ( $x = 0, 2, 4, 6, 8, 10$ ) (Page 5-7)
3. **Table S3.** Selected important interatomic distances (Å) in  $\text{La}_4\text{Ge}_3\text{Se}_x\text{S}_{12-x}$  ( $x = 0, 2, 4, 6, 8, 10$ ) (Page 8-11)
4. **Figure S1.** The calculated and experimental X-ray diffraction patterns of  $\text{La}_4\text{Ge}_3\text{S}_{12}$ . (Page 12)
5. **Figure S2.** The calculated and experimental X-ray diffraction patterns of  $\text{La}_4\text{Ge}_3\text{Se}_2\text{S}_{10}$ . (Page 13)
6. **Figure S3.** The calculated and experimental X-ray diffraction patterns of  $\text{La}_4\text{Ge}_3\text{Se}_4\text{S}_8$ . (Page 14)

7. **Figure S4.** The calculated and experimental X-ray diffraction patterns of  $\text{La}_4\text{Ge}_3\text{Se}_6\text{S}_6$ . (Page 15)
8. **Figure S5.** The calculated and experimental X-ray diffraction patterns of  $\text{La}_4\text{Ge}_3\text{Se}_8\text{S}_4$ . (Page 16)
9. **Figure S6.** The calculated and experimental X-ray diffraction patterns of  $\text{La}_4\text{Ge}_3\text{Se}_{10}\text{S}_2$ . (Page 17)
10. **Figure S7.** A comparison of Se content and unit cell volume in  $\text{La}_4\text{Ge}_3\text{Se}_x\text{S}_{12-x}$  ( $x = 0, 2, 4, 6, 8, 10$ ), emphasizing the linear increase of volume as Se is incorporated into the crystal structure. (Page 18)
11. **Figure S8.** Tauc plots for allowed direct and indirect transitions of  $\text{La}_4\text{Ge}_3\text{S}_{12}$ . (Page 19)
12. **Figure S9.** Tauc plots for allowed direct and indirect transitions of  $\text{La}_4\text{Ge}_3\text{Se}_2\text{S}_{10}$ . (Page 20)
13. **Figure S10.** Tauc plots for allowed direct and indirect transitions of  $\text{La}_4\text{Ge}_3\text{Se}_4\text{S}_8$ . (Page 21)
14. **Figure S11.** Tauc plots for allowed direct and indirect transitions of  $\text{La}_4\text{Ge}_3\text{Se}_6\text{S}_6$ . (Page 22)
15. **Figure S12.** Tauc plots for allowed direct and indirect transitions of  $\text{La}_4\text{Ge}_3\text{Se}_8\text{S}_4$ . (Page 23)
16. **Figure S13.** Tauc plots for allowed direct and indirect transitions of  $\text{La}_4\text{Ge}_3\text{Se}_{10}\text{S}_2$ . (Page 24)
17. **Figure S14.** SHG intensities of  $\text{La}_4\text{Ge}_3\text{Se}_4\text{S}_8$  and  $\text{AgGaS}_2$  @2.09  $\mu\text{m}$  measured at variable particle size samples. (Page 25)
18. **Figure S15.** SHG intensities of  $\text{La}_4\text{Ge}_3\text{Se}_6\text{S}_6$  and  $\text{AgGaS}_2$  @2.09  $\mu\text{m}$  measured at variable particle size samples. (Page 26)
19. **Figure S16.** SHG intensities of  $\text{La}_4\text{Ge}_3\text{Se}_8\text{S}_4$  and  $\text{AgGaS}_2$  @2.09  $\mu\text{m}$  measured at variable particle size samples. (Page 27)

20. **Figure S17.** Calculated birefringence of  $\text{La}_4\text{Ge}_3\text{S}_{12}$  versus wavelength of the fundamental light. (Page 28)
21. **Figure S18.** Calculated birefringence of  $\text{La}_4\text{Ge}_3\text{Se}_6\text{S}_6$  versus wavelength of the fundamental light. (Page 29)
22. **Table S4.** Results of EDX analyses of selected crystals of  $\text{La}_4\text{Ge}_3\text{Se}_2\text{S}_{10}$ ,  $\text{La}_4\text{Ge}_3\text{Se}_6\text{S}_6$ , and  $\text{La}_4\text{Ge}_3\text{Se}_{10}\text{S}_2$ . (Page 29-31)

**Table S1.** Selected crystal data and unit cell parameters for  $\text{La}_4\text{Ge}_3\text{Se}_x\text{S}_{12-x}$  ( $x = 0, 2, 4, 6, 8, 10$ )

| Empirical Formula                    | $\text{La}_4\text{Ge}_3\text{S}_{12}$ | $\text{La}_4\text{Ge}_3\text{Se}_2\text{S}_{10}$ | $\text{La}_4\text{Ge}_3\text{Se}_4\text{S}_8$ | $\text{La}_4\text{Ge}_3\text{Se}_6\text{S}_6$ | $\text{La}_4\text{Ge}_3\text{Se}_8\text{S}_4$ | $\text{La}_4\text{Ge}_3\text{Se}_{10}\text{S}_2$ |
|--------------------------------------|---------------------------------------|--------------------------------------------------|-----------------------------------------------|-----------------------------------------------|-----------------------------------------------|--------------------------------------------------|
| Formula weight                       | 1158.13                               | 1247.40                                          | 1356.28                                       | 1423.43                                       | 1521.60                                       | 1616.26                                          |
| Temperature                          | 200(2) K                              | 296(2) K                                         | 296(2) K                                      | 296(2) K                                      | 296(2) K                                      | 296(2) K                                         |
| Radiation, wavelength                | Mo-K $\alpha$ , 0.71073 Å             | Mo-K $\alpha$ , 0.71073 Å                        | Mo-K $\alpha$ , 0.71073 Å                     | Mo-K $\alpha$ , 0.71073 Å                     | Mo-K $\alpha$ , 0.71073 Å                     | Mo-K $\alpha$ , 0.71073 Å                        |
| Crystal system                       | Rhombohedral                          |                                                  |                                               |                                               |                                               |                                                  |
| Space group                          | $R\bar{3}c$ (No. 161)                 |                                                  |                                               |                                               |                                               |                                                  |
| Unit cell dimensions                 | a=19.427(3) Å<br>c=8.0753(13) Å       | a=19.5575(6) Å<br>c=8.1468(19) Å                 | a=19.6679(12) Å<br>c=8.1950(6) Å              | a=19.7766(11) Å<br>c= 8.2448(4) Å             | a=19.8976(12) Å<br>c=8.2984(4) Å              | a=20.0723(12) Å<br>c=8.3460(5) Å                 |
| Unit cell volume                     | 2639.2(10) Å <sup>3</sup>             | 2698.64(19) Å <sup>3</sup>                       | 2745.3(4) Å <sup>3</sup>                      | 2792.6(3) Å <sup>3</sup>                      | 2845.3(4) Å <sup>3</sup>                      | 2912.1(4) Å <sup>3</sup>                         |
| Z                                    | 6                                     |                                                  |                                               |                                               |                                               |                                                  |
| Density (calc)                       | 4.372 g/cm <sup>3</sup>               | 4.605 g/cm <sup>3</sup>                          | 4.922 g/cm <sup>3</sup>                       | 5.078 g/cm <sup>3</sup>                       | 5.328 g/cm <sup>3</sup>                       | 5.530 g/cm <sup>3</sup>                          |
| Absorption coefficient               | 15.942 mm <sup>-1</sup>               | 19.221 mm <sup>-1</sup>                          | 23.427 mm <sup>-1</sup>                       | 25.491 mm <sup>-1</sup>                       | 28.806 mm <sup>-1</sup>                       | 31.713 mm <sup>-1</sup>                          |
| Final R indices [ $I > 2\sigma(I)$ ] | $R_1 = 0.0323$ , $wR_2 = 0.0634$      | $R_1 = 0.0351$ , $wR_2 = 0.0618$                 | $R_1 = 0.0323$ , $wR_2 = 0.0518$              | $R_1 = 0.0296$ , $wR_2 = 0.0439$              | $R_1 = 0.0391$ , $wR_2 = 0.0709$              | $R_1 = 0.0368$ , $wR_2 = 0.0632$                 |
| Final R indices [all data]           | $R_1 = 0.0383$ , $wR_2 = 0.0763$      | $R_1 = 0.0520$ , $wR_2 = 0.0812$                 | $R_1 = 0.0415$ , $wR_2 = 0.0597$              | $R_1 = 0.0374$ , $wR_2 = 0.0457$              | $R_1 = 0.0646$ , $wR_2 = 0.0840$              | $R_1 = 0.0515$ , $wR_2 = 0.0680$                 |

**Table S2.** Refined atomic coordinates and isotropic displacement parameters for  $\text{La}_4\text{Ge}_3\text{Se}_x\text{S}_{12-x}$  ( $x = 0, 2, 4, 6, 8, 10$ )

| Atoms                                            | Wyckoff    | $x$         | $y$         | $z$          | Occupancy | $U_{\text{eq}} (\text{\AA}^2)$ |
|--------------------------------------------------|------------|-------------|-------------|--------------|-----------|--------------------------------|
| $\text{La}_4\text{Ge}_3\text{S}_{12}$            |            |             |             |              |           |                                |
| La1                                              | <i>18b</i> | 0.56401(7)  | 0.66945(9)  | 0.97069(15)  | 1         | 0.0113(3)                      |
| La2                                              | <i>6a</i>  | 0.3333      | 0.6667      | 0.6736(2)    | 1         | 0.0092(5)                      |
| Ge1                                              | <i>18b</i> | 0.34629(12) | 0.47923(13) | 1.0210(3)    | 1         | 0.0074(5)                      |
| S1                                               | <i>18b</i> | 0.2470(3)   | 0.4661(3)   | 1.1771(7)    | 1         | 0.0110(11)                     |
| S2                                               | <i>18b</i> | 0.3939(3)   | 0.6029(3)   | 0.9226(6)    | 1         | 0.0101(11)                     |
| S3                                               | <i>18b</i> | 0.6039(3)   | 0.6631(3)   | 1.3253(6)    | 1         | 0.0117(12)                     |
| S4                                               | <i>18b</i> | 0.5113(3)   | 0.5572(3)   | 0.6789(6)    | 1         | 0.0123(11)                     |
| $\text{La}_4\text{Ge}_3\text{Se}_2\text{S}_{10}$ |            |             |             |              |           |                                |
| La1                                              | <i>18b</i> | 0.43819(6)  | 0.33469(7)  | 0.97798(14)  | 1         | 0.0188(3)                      |
| La2                                              | <i>6a</i>  | 0.6667      | 0.3333      | 1.1813(2)    | 1         | 0.0138(4)                      |
| Ge1                                              | <i>18b</i> | 0.68003(10) | 0.53332(11) | 1.0269(2)    | 1         | 0.0125(4)                      |
| S1                                               | <i>18b</i> | 0.57954(18) | 0.44671(19) | 1.1871(4)    | 0.687(16) | 0.0165(10)                     |
| Se1                                              | <i>18b</i> | 0.57954(18) | 0.44671(19) | 1.1871(4)    | 0.313(16) | 0.0165(10)                     |
| S2                                               | <i>18b</i> | 0.4454(2)   | 0.4896(2)   | 1.0171(4)    | 0.796(15) | 0.0178(12)                     |
| Se2                                              | <i>18b</i> | 0.4454(2)   | 0.4896(2)   | 1.0171(4)    | 0.204(15) | 0.0178(12)                     |
| S3                                               | <i>18b</i> | 0.3916(2)   | 0.3286(2)   | 1.3313(5)    | 0.880(15) | 0.0191(13)                     |
| Se3                                              | <i>18b</i> | 0.3916(2)   | 0.3286(2)   | 1.3313(5)    | 0.120(15) | 0.0191(13)                     |
| S4                                               | <i>18b</i> | 0.5423(2)   | 0.2691(3)   | 0.9298(5)    | 1         | 0.0129(8)                      |
| $\text{La}_4\text{Ge}_3\text{Se}_4\text{S}_8$    |            |             |             |              |           |                                |
| La1                                              | <i>18b</i> | 0.43797(5)  | 0.33346(6)  | 0.02593(9)   | 1         | 0.01817(19)                    |
| La2                                              | <i>6a</i>  | 0.6667      | 0.3333      | 0.32203(13)  | 1         | 0.0112(3)                      |
| Ge1                                              | <i>18b</i> | 0.65285(8)  | 0.51901(8)  | -0.02245(15) | 1         | 0.0114(3)                      |
| S1                                               | <i>18b</i> | 0.75416(10) | 0.53323(10) | -0.1847(2)   | 0.366(11) | 0.0153(6)                      |
| Se1                                              | <i>18b</i> | 0.75416(10) | 0.53323(10) | -0.1847(2)   | 0.634(11) | 0.0153(6)                      |
| S2                                               | <i>18b</i> | 0.60615(18) | 0.39664(18) | 0.0732(3)    | 0.977(11) | 0.0118(9)                      |
| Se2                                              | <i>18b</i> | 0.60615(18) | 0.39664(18) | 0.0732(3)    | 0.023(11) | 0.0118(9)                      |
| S3                                               | <i>18b</i> | 0.39643(13) | 0.33939(14) | -0.3276(3)   | 0.724(10) | 0.0150(7)                      |

| Atoms                                                           | Wyckoff    | <i>x</i>    | <i>y</i>    | <i>z</i>    | Occupancy | $U_{eq}$ (Å <sup>2</sup> ) |
|-----------------------------------------------------------------|------------|-------------|-------------|-------------|-----------|----------------------------|
| Se3                                                             | <i>18b</i> | 0.39643(13) | 0.33939(14) | -0.3276(3)  | 0.276(10) | 0.0150(7)                  |
| S4                                                              | <i>18b</i> | 0.49060(11) | 0.44729(11) | 0.3208(2)   | 0.522(11) | 0.0156(6)                  |
| Se4                                                             | <i>18b</i> | 0.49060(11) | 0.44729(11) | 0.3208(2)   | 0.478(11) | 0.0156(6)                  |
| La <sub>4</sub> Ge <sub>3</sub> Se <sub>6</sub> S <sub>6</sub>  |            |             |             |             |           |                            |
| La1                                                             | <i>18b</i> | 0.56130(4)  | 0.66595(5)  | 0.97383(8)  | 1         | 0.01846(18)                |
| La2                                                             | <i>6a</i>  | 0.3333      | 0.6667      | 0.67836(12) | 1         | 0.0115(2)                  |
| Ge1                                                             | <i>18b</i> | 0.34722(7)  | 0.48143(6)  | 1.02229(14) | 1         | 0.0118(3)                  |
| S1                                                              | <i>18b</i> | 0.24572(7)  | 0.46723(8)  | 1.18522(16) | 0.240(9)  | 0.0142(5)                  |
| Se1                                                             | <i>18b</i> | 0.24572(7)  | 0.46723(8)  | 1.18522(16) | 0.760(9)  | 0.0142(5)                  |
| S2                                                              | <i>18b</i> | 0.39365(15) | 0.60361(14) | 0.9275(3)   | 0.965(9)  | 0.0119(9)                  |
| Se2                                                             | <i>18b</i> | 0.39365(15) | 0.60361(14) | 0.9275(3)   | 0.035(9)  | 0.0119(9)                  |
| S3                                                              | <i>18b</i> | 0.60387(9)  | 0.66028(10) | 1.3274(2)   | 0.535(9)  | 0.0170(6)                  |
| Se3                                                             | <i>18b</i> | 0.60387(9)  | 0.66028(10) | 1.3274(2)   | 0.465(9)  | 0.0170(6)                  |
| S4                                                              | <i>18b</i> | 0.50915(8)  | 0.55226(8)  | 0.67890(18) | 0.374(8)  | 0.0150(5)                  |
| Se4                                                             | <i>18b</i> | 0.50915(8)  | 0.55226(8)  | 0.67890(18) | 0.626(8)  | 0.0150(5)                  |
| La <sub>4</sub> Ge <sub>3</sub> Se <sub>8</sub> S <sub>4</sub>  |            |             |             |             |           |                            |
| La1                                                             | <i>18b</i> | 0.43908(7)  | 0.33400(8)  | 0.02710(15) | 1         | 0.0200(3)                  |
| La2                                                             | <i>6a</i>  | 0.6667      | 0.3333      | 0.3209(2)   | 1         | 0.0155(5)                  |
| Ge1                                                             | <i>18b</i> | 0.65278(12) | 0.51812(12) | -0.0231(3)  | 1         | 0.0142(5)                  |
| S1                                                              | <i>18b</i> | 0.75433(12) | 0.53228(13) | -0.1854(3)  | 0.067(19) | 0.0175(8)                  |
| Se1                                                             | <i>18b</i> | 0.75433(12) | 0.53228(13) | -0.1854(3)  | 0.933(19) | 0.0175(8)                  |
| S2                                                              | <i>18b</i> | 0.6063(2)   | 0.3959(2)   | 0.0723(5)   | 0.864(18) | 0.0143(14)                 |
| Se2                                                             | <i>18b</i> | 0.6063(2)   | 0.3959(2)   | 0.0723(5)   | 0.136(18) | 0.0143(14)                 |
| S3                                                              | <i>18b</i> | 0.39621(13) | 0.34008(15) | -0.3270(3)  | 0.320(18) | 0.0178(9)                  |
| Se3                                                             | <i>18b</i> | 0.39621(13) | 0.34008(15) | -0.3270(3)  | 0.680(18) | 0.0178(9)                  |
| S4                                                              | <i>18b</i> | 0.49129(13) | 0.44805(12) | 0.3201(3)   | 0.165(18) | 0.0178(8)                  |
| Se4                                                             | <i>18b</i> | 0.49129(13) | 0.44805(12) | 0.3201(3)   | 0.835(18) | 0.0178(8)                  |
| La <sub>4</sub> Ge <sub>3</sub> Se <sub>10</sub> S <sub>2</sub> |            |             |             |             |           |                            |
| La1                                                             | <i>18b</i> | 0.56213(6)  | 0.66732(6)  | 0.97182(13) | 1         | 0.0187(3)                  |
| La2                                                             | <i>6a</i>  | 0.3333      | 0.6667      | 0.6788(2)   | 1         | 0.0156(4)                  |

| Atoms | Wyckoff    | $x$         | $y$         | $z$       | Occupancy | $U_{\text{eq}}$ (Å <sup>2</sup> ) |
|-------|------------|-------------|-------------|-----------|-----------|-----------------------------------|
| Ge1   | <i>18b</i> | 0.34685(10) | 0.48149(10) | 1.0251(2) | 1         | 0.0129(4)                         |
| Se1   | <i>18b</i> | 0.24530(9)  | 0.46716(10) | 1.1854(2) | 1         | 0.0166(4)                         |
| S2    | <i>18b</i> | 0.39433(14) | 0.60466(14) | 0.9272(3) | 0.577(15) | 0.0131(9)                         |
| Se2   | <i>18b</i> | 0.39433(14) | 0.60466(14) | 0.9272(3) | 0.423(15) | 0.0131(9)                         |
| S3    | <i>18b</i> | 0.60401(9)  | 0.65991(11) | 1.3267(2) | 0.135(14) | 0.0154(6)                         |
| Se3   | <i>18b</i> | 0.60401(9)  | 0.65991(11) | 1.3267(2) | 0.865(14) | 0.0154(6)                         |
| S4    | <i>18b</i> | 0.50909(10) | 0.55265(9)  | 0.6819(2) | 0.032(14) | 0.0166(6)                         |
| Se4   | <i>18b</i> | 0.50909(10) | 0.55265(9)  | 0.6819(2) | 0.968(14) | 0.0166(6)                         |

**Table S3.** Selected important interatomic distances (Å) in  $\text{La}_4\text{Ge}_3\text{Se}_x\text{S}_{12-x}$  ( $x = 0, 2, 4, 6, 8, 10$ )

| Atom Pairs                                       |     | Distances (Å) | Atom Pairs |          | Distances (Å) |
|--------------------------------------------------|-----|---------------|------------|----------|---------------|
| $\text{La}_4\text{Ge}_3\text{S}_{12}$            |     |               |            |          |               |
| La1                                              | S3  | 2.868(5)      | La2        | S2       | 2.901(5)      |
|                                                  | S2  | 2.911(5)      |            | S2       | 2.901(5)      |
|                                                  | S4  | 2.945(6)      |            | S2       | 2.901(5)      |
|                                                  | S3  | 2.985(5)      |            | S2       | 2.913(5)      |
|                                                  | S1  | 3.013(5)      |            | S2       | 2.913(5)      |
|                                                  | S4  | 3.021(6)      |            | S2       | 2.913(5)      |
|                                                  | S1  | 3.089(5)      |            | S1       | 3.386(6)      |
| Ge1                                              | S4  | 2.197(6)      | S1         | 3.386(6) |               |
|                                                  | S3  | 2.200(5)      | S1         | 3.386(6) |               |
|                                                  | S1  | 2.209(6)      |            |          |               |
|                                                  | S2  | 2.244(6)      |            |          |               |
| $\text{La}_4\text{Ge}_3\text{Se}_2\text{S}_{10}$ |     |               |            |          |               |
| La1                                              | Se3 | 2.888(4)      | La2        | S4       | 2.922(4)      |
|                                                  | S3  | 2.888(4)      |            | S4       | 2.922(4)      |
|                                                  | S4  | 2.924(4)      |            | S4       | 2.922(4)      |
|                                                  | S2  | 2.979(4)      |            | S4       | 2.939(4)      |
|                                                  | S3  | 3.004(4)      |            | S4       | 2.939(4)      |
|                                                  | S1  | 3.048(3)      |            | S4       | 2.939(4)      |
|                                                  | Se2 | 3.073(4)      |            | Se1      | 3.406(3)      |
|                                                  | S2  | 3.073(4)      |            | Se1      | 3.406(3)      |
|                                                  | S1  | 3.118(3)      |            |          |               |
|                                                  | Ge1 | Se3           |            | 2.229(4) |               |
| S3                                               |     | 2.229(4)      |            |          |               |
| S4                                               |     | 2.237(5)      |            |          |               |
| S2                                               |     | 2.244(4)      |            |          |               |
| Se2                                              |     | 2.244(4)      |            |          |               |
| S1                                               |     | 2.260(4)      |            |          |               |



| Atom Pairs                                                     |     | Distances (Å) | Atom Pairs |          | Distances (Å) |
|----------------------------------------------------------------|-----|---------------|------------|----------|---------------|
| <b>La<sub>4</sub>Ge<sub>3</sub>Se<sub>4</sub>S<sub>8</sub></b> |     |               |            |          |               |
| La1                                                            | Se3 | 2.908(2)      | La2        | Se2      | 2.934(3)      |
|                                                                | S3  | 2.908(2)      |            | S2       | 2.934(3)      |
|                                                                | S2  | 2.920(3)      |            | Se2      | 2.934(3)      |
|                                                                | Se4 | 3.023(2)      |            | S2       | 2.934(3)      |
|                                                                | S4  | 3.023(2)      |            | S2       | 2.934(3)      |
|                                                                | S3  | 3.028(2)      |            | Se2      | 2.947(3)      |
|                                                                | S1  | 3.0745(18)    |            | S2       | 2.947(3)      |
|                                                                | Se1 | 3.0745(18)    |            | Se2      | 2.947(3)      |
|                                                                | S4  | 3.100(2)      |            | S2       | 2.947(3)      |
|                                                                | Ge1 | S2            |            | 2.245(3) | Se2           |
| Se3                                                            |     | 2.255(3)      | S2         | 2.947(3) |               |
| S3                                                             |     | 2.255(3)      |            |          |               |
| Se4                                                            |     | 2.279(2)      |            |          |               |
| S4                                                             |     | 2.279(2)      |            |          |               |
| S1                                                             |     | 2.293(2)      |            |          |               |
|                                                                |     |               |            |          |               |
| <b>La<sub>4</sub>Ge<sub>3</sub>Se<sub>6</sub>S<sub>6</sub></b> |     |               |            |          |               |
| La1                                                            | Se3 | 2.9257(17)    | La2        | Se2      | 2.947(3)      |
|                                                                | S3  | 2.9257(17)    |            | S2       | 2.947(3)      |
|                                                                | S2  | 2.928(3)      |            | Se2      | 2.947(3)      |
|                                                                | S3  | 3.0514(18)    |            | S2       | 2.947(3)      |
|                                                                | Se4 | 3.0540(16)    |            | S2       | 2.947(3)      |
|                                                                | S4  | 3.0540(16)    |            | Se2      | 2.957(3)      |
|                                                                | S1  | 3.0928(14)    |            | S2       | 2.957(3)      |
|                                                                | Se1 | 3.0928(14)    |            | Se2      | 2.957(3)      |
|                                                                | S4  | 3.1166(16)    |            | S2       | 2.957(3)      |
|                                                                | Ge1 | S2            |            | 2.253(3) | Se2           |
| Se3                                                            |     | 2.280(2)      | S2         | 2.957(3) |               |
| S3                                                             |     | 2.280(2)      |            |          |               |
| Se4                                                            |     | 2.2986(18)    |            |          |               |

| Atom Pairs                                                      |     | Distances (Å) | Atom Pairs |     | Distances (Å) |
|-----------------------------------------------------------------|-----|---------------|------------|-----|---------------|
|                                                                 | S4  | 2.2986(18)    |            |     |               |
| Ge1                                                             | S1  | 2.3128(18)    |            |     |               |
| <hr/>                                                           |     |               |            |     |               |
| La <sub>4</sub> Ge <sub>3</sub> Se <sub>8</sub> S <sub>4</sub>  |     |               |            |     |               |
| La1                                                             | S2  | 2.937(4)      | La2        | Se2 | 2.957(4)      |
|                                                                 | Se3 | 2.954(3)      |            | S2  | 2.957(4)      |
|                                                                 | S3  | 2.954(3)      |            | Se2 | 2.957(4)      |
|                                                                 | S3  | 3.079(3)      |            | S2  | 2.957(4)      |
|                                                                 | Se4 | 3.083(3)      |            | S2  | 2.957(4)      |
|                                                                 | S4  | 3.083(3)      |            | Se2 | 2.973(4)      |
|                                                                 | S1  | 3.109(2)      |            | S2  | 2.973(4)      |
|                                                                 | Se1 | 3.109(2)      |            | Se2 | 2.973(4)      |
|                                                                 | S4  | 3.128(3)      |            | S2  | 2.973(4)      |
| Ge1                                                             | S2  | 2.269(4)      |            | Se2 | 2.973(4)      |
|                                                                 | Se3 | 2.309(3)      |            | S2  | 2.973(4)      |
|                                                                 | S3  | 2.309(3)      |            |     |               |
|                                                                 | Se4 | 2.319(3)      |            |     |               |
|                                                                 | S4  | 2.319(3)      |            |     |               |
|                                                                 | S1  | 2.325(3)      |            |     |               |
| <hr/>                                                           |     |               |            |     |               |
| La <sub>4</sub> Ge <sub>3</sub> Se <sub>10</sub> S <sub>2</sub> |     |               |            |     |               |
| La1                                                             | S2  | 2.971(3)      | La2        | Se2 | 2.978(3)      |
|                                                                 | Se3 | 2.9745(19)    |            | S2  | 2.978(3)      |
|                                                                 | S3  | 2.9745(19)    |            | Se2 | 2.978(3)      |
|                                                                 | Se4 | 3.086(2)      |            | S2  | 2.978(3)      |
|                                                                 | S4  | 3.086(2)      |            | S2  | 2.978(3)      |
|                                                                 | S3  | 3.103(2)      |            | Se2 | 2.997(3)      |
|                                                                 | Se1 | 3.1272(19)    |            | S2  | 2.997(3)      |
|                                                                 | S4  | 3.136(2)      |            | Se2 | 2.997(3)      |
|                                                                 | Se1 | 3.188(2)      |            | S2  | 2.997(3)      |
| Ge1                                                             | S2  | 2.309(3)      |            | Se2 | 2.997(3)      |
|                                                                 | Se4 | 2.332(2)      |            | S2  | 2.997(3)      |

| Atom Pairs | Distances (Å) | Atom Pairs | Distances (Å) |
|------------|---------------|------------|---------------|
|            | S4            |            | 2.332(2)      |
|            | Se1           |            | 2.333(2)      |
| Ge1        | Se3           |            | 2.339(3)      |
|            | S3            |            | 2.339(3)      |

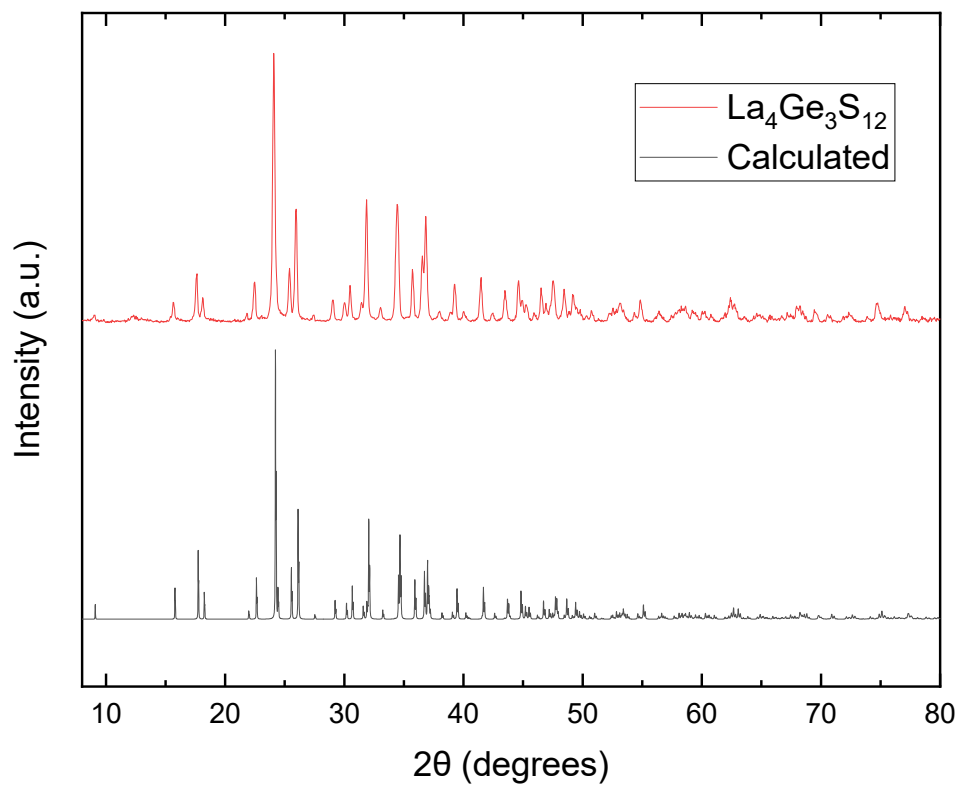

**Fi**

**Figure S1.** The calculated and experimental X-ray diffraction patterns of  $\text{La}_4\text{Ge}_3\text{S}_{12}$ .

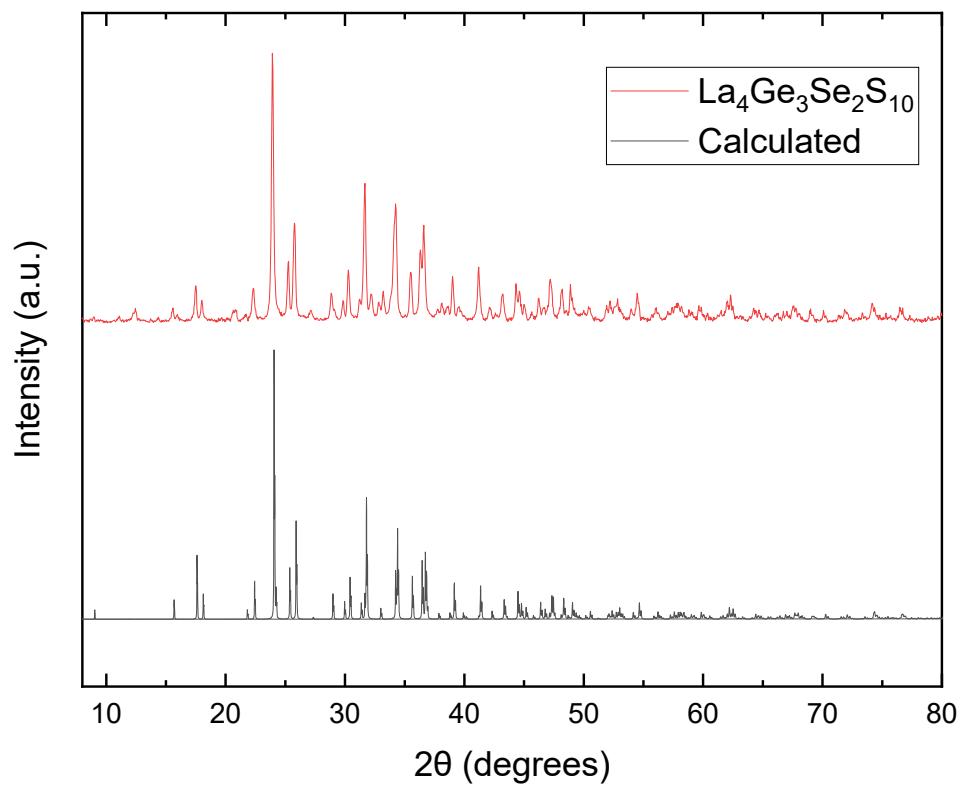

**Fi**

**Figure S2.** The calculated and experimental X-ray diffraction patterns of  $\text{La}_4\text{Ge}_3\text{Se}_2\text{S}_{10}$ .

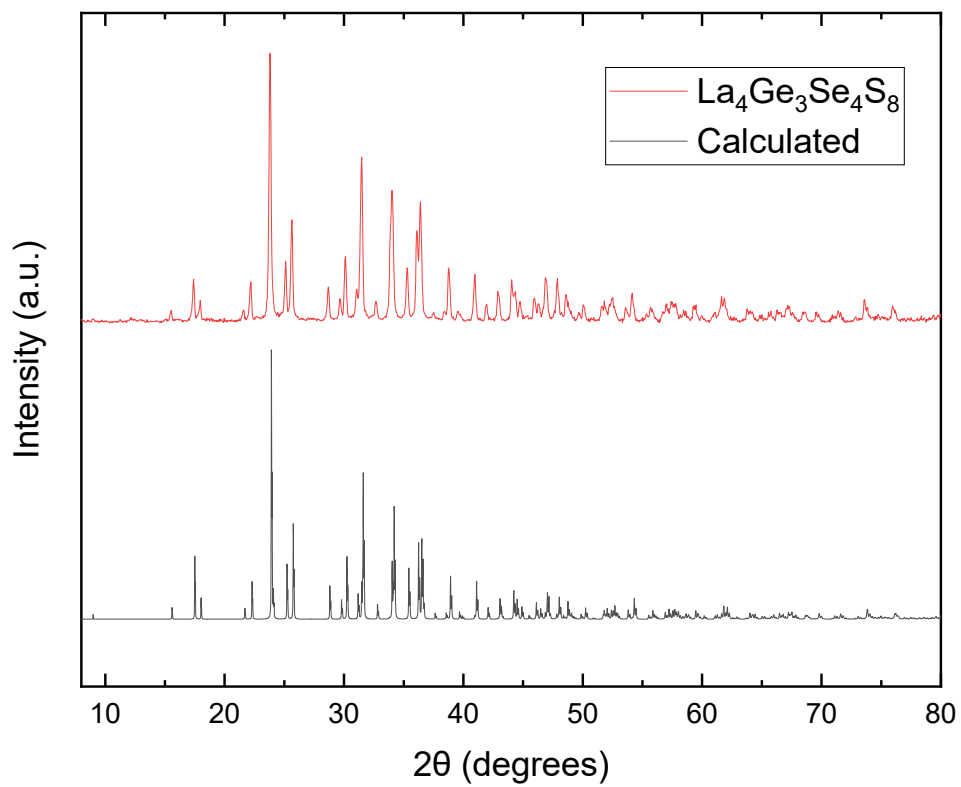

**Fi**

**Figure S3.** The calculated and experimental X-ray diffraction patterns of  $\text{La}_4\text{Ge}_3\text{Se}_4\text{S}_8$ .

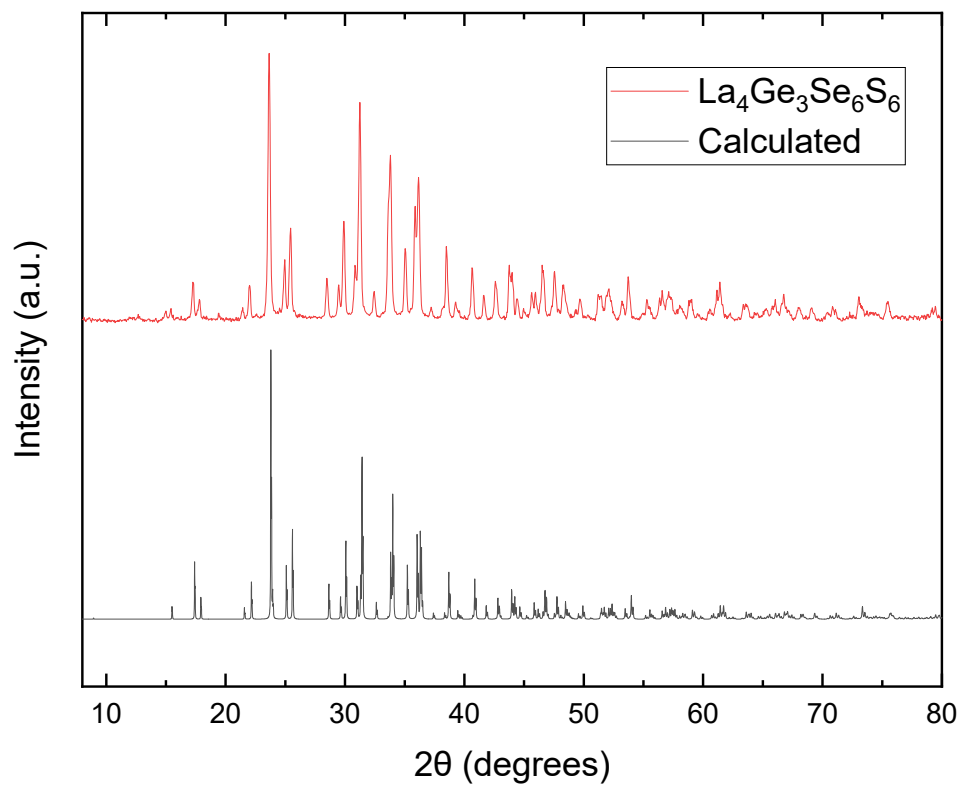

**Fi**

**Figure S4.** The calculated and experimental X-ray diffraction patterns of  $\text{La}_4\text{Ge}_3\text{Se}_6\text{S}_6$ .

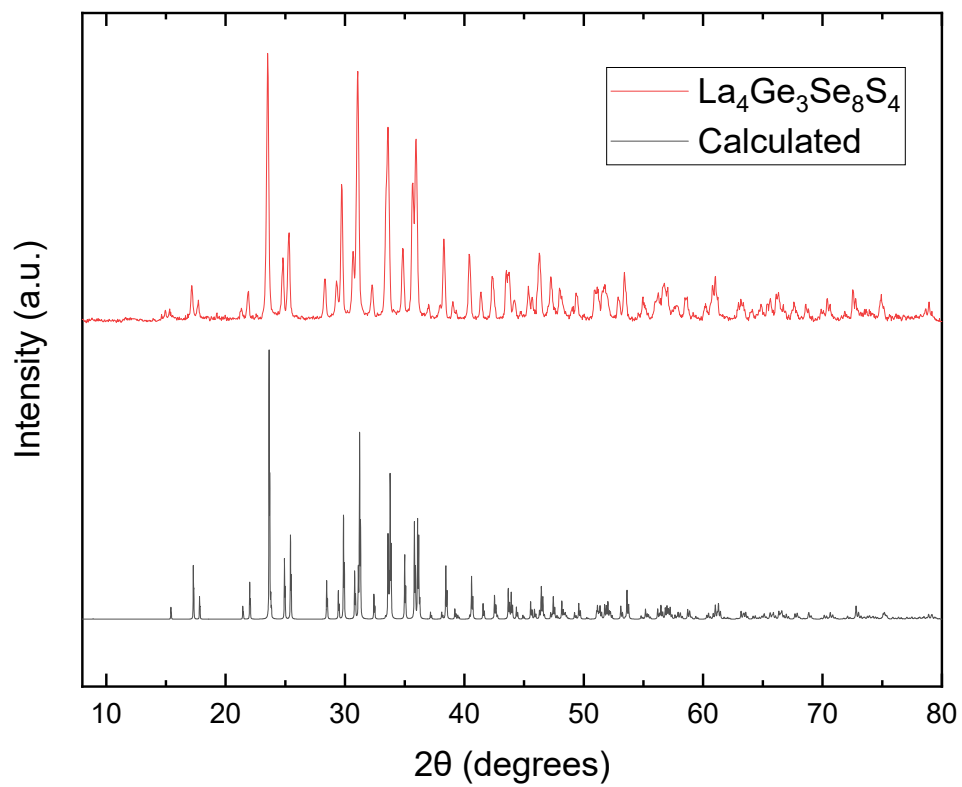

**Fi**

**Figure S5.** The calculated and experimental X-ray diffraction patterns of  $\text{La}_4\text{Ge}_3\text{Se}_8\text{S}_4$ .



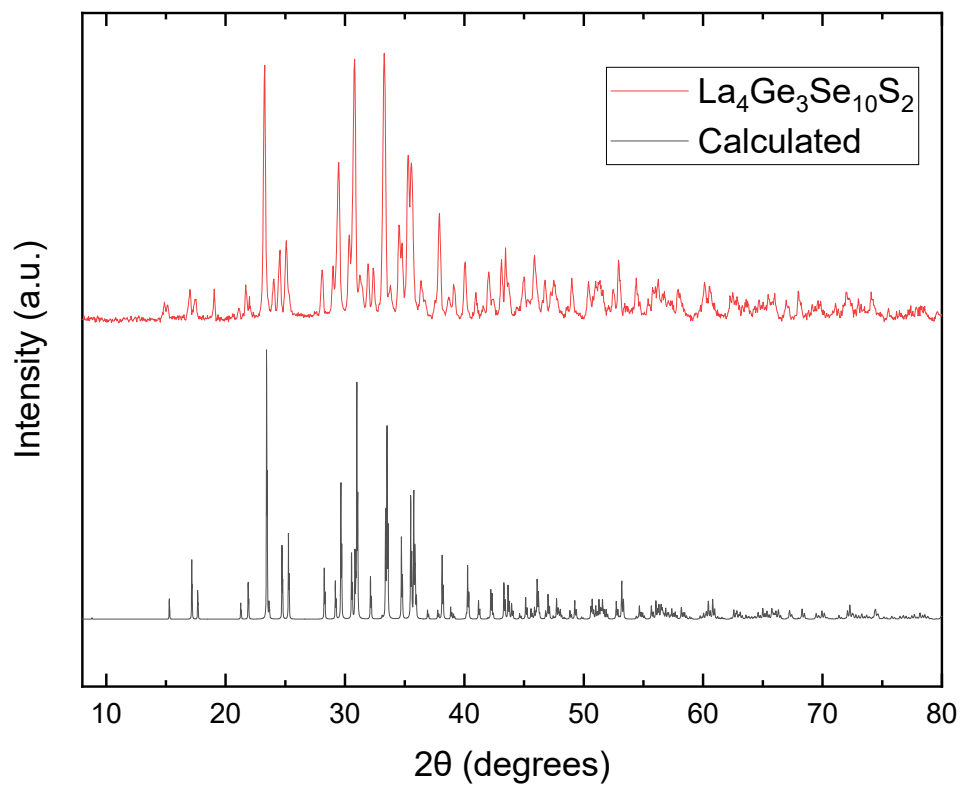

**Figure S6.** The calculated and experimental X-ray diffraction patterns of  $\text{La}_4\text{Ge}_3\text{Se}_{10}\text{S}_2$ .

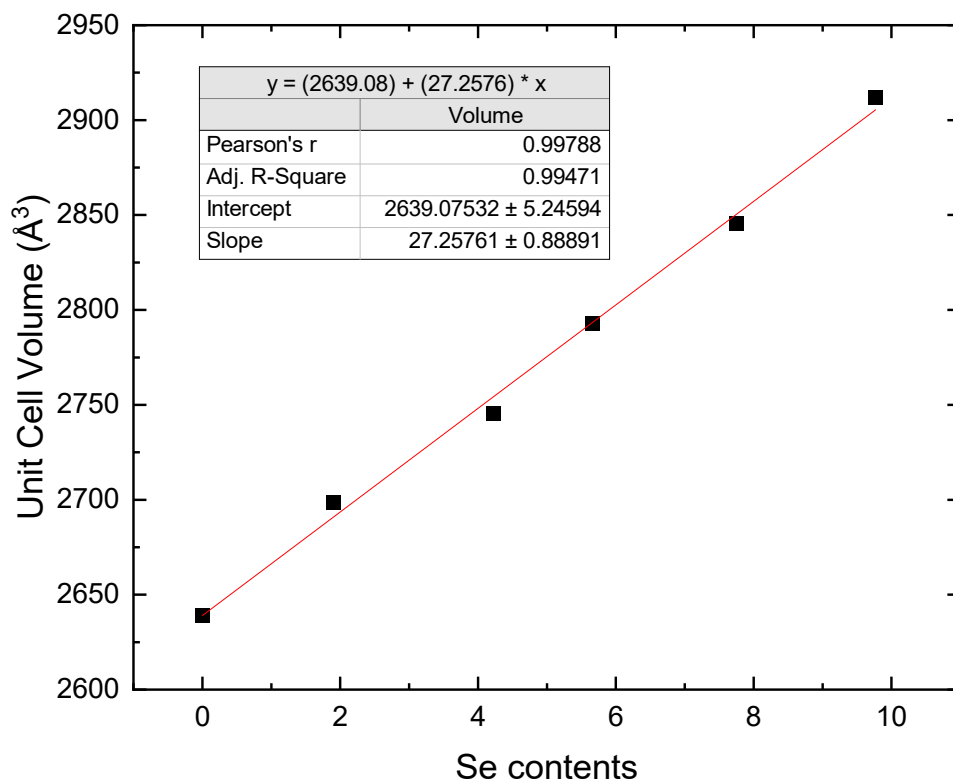

**Figure S7.** A comparison of Se contents and unit cell volume in  $\text{La}_4\text{Ge}_3\text{Se}_x\text{S}_{12-x}$  ( $x = 0, 2, 4, 6, 8, 10$ ), emphasizing the linear increase of volume as Se is incorporated into the crystal structure.

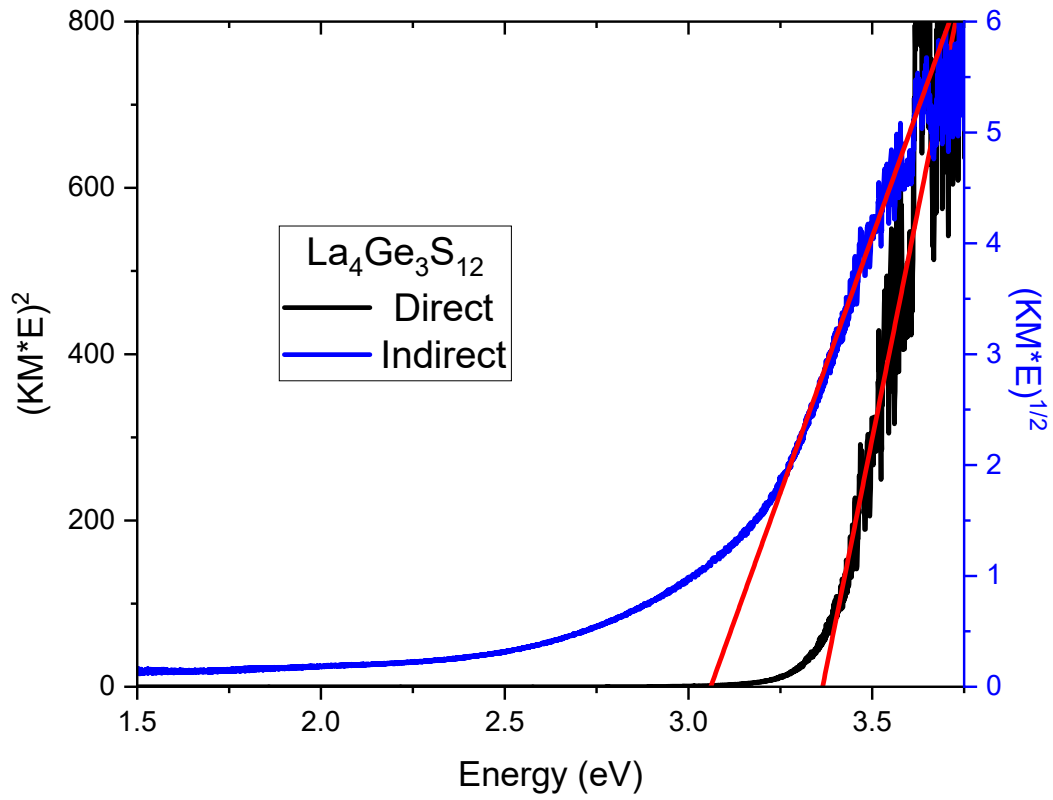

**Fi**

**gure S8.** Tauc plots for allowed direct and indirect transitions of  $\text{La}_4\text{Ge}_3\text{S}_{12}$ .

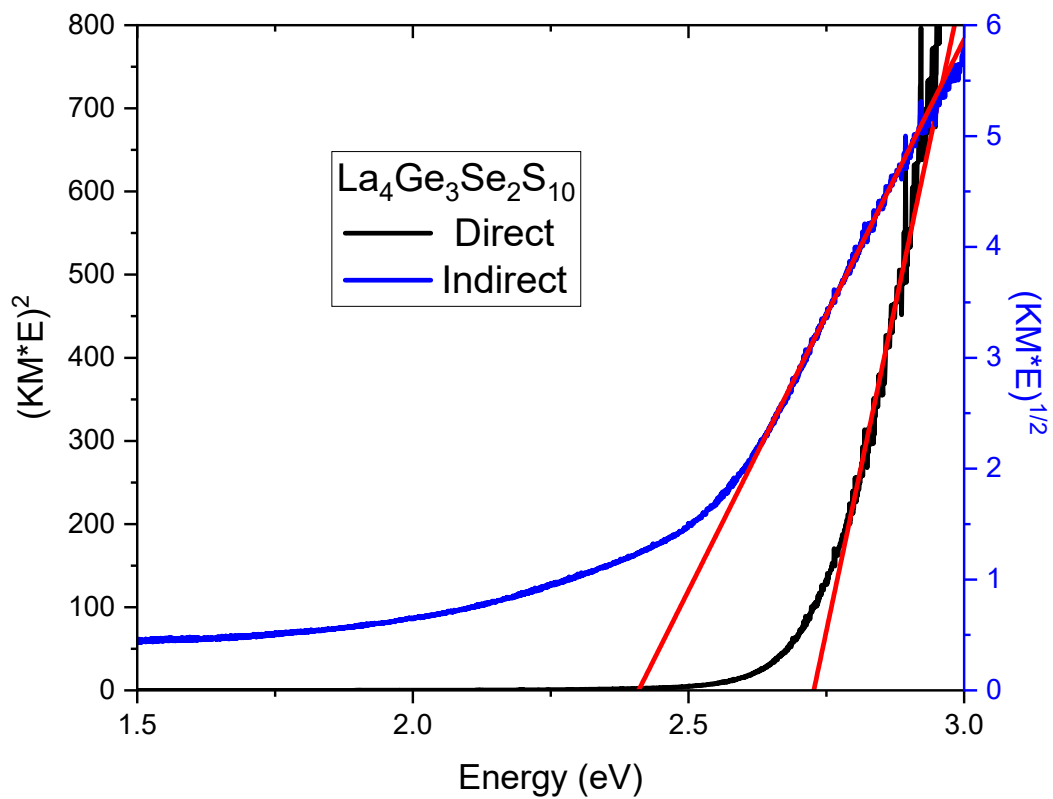

**Fi**

**Figure S9.** Tauc plots for allowed direct and indirect transitions of  $\text{La}_4\text{Ge}_3\text{Se}_2\text{S}_{10}$ .

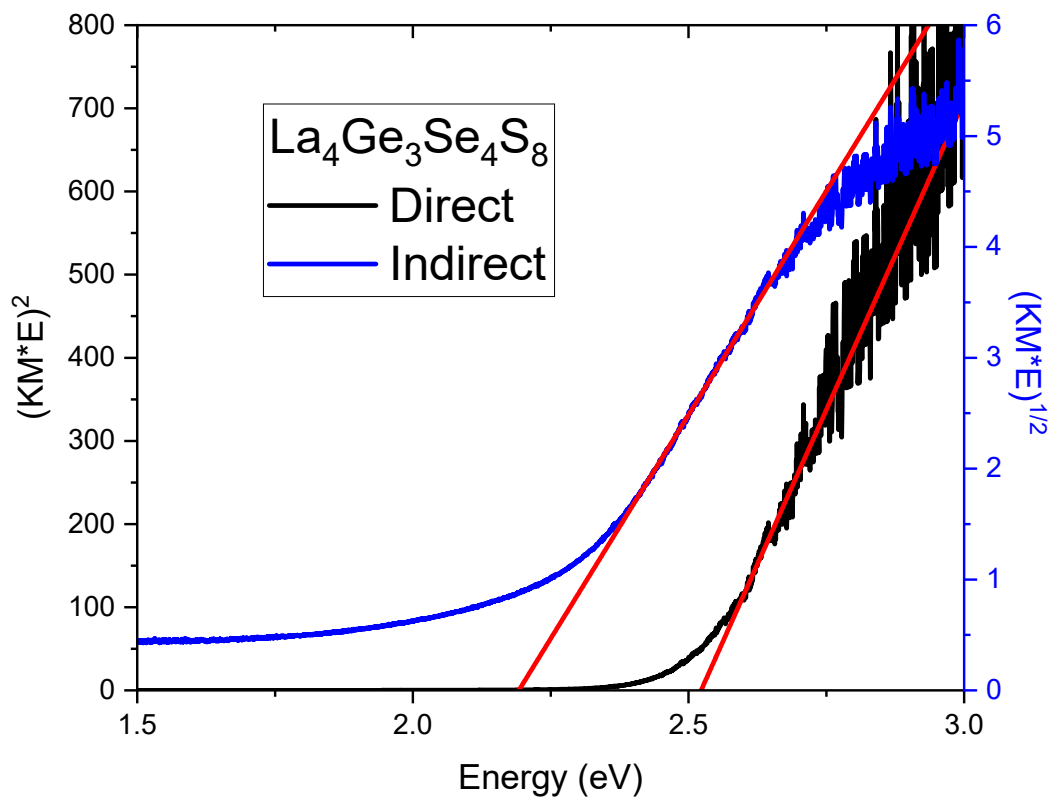

Fi

Figure S10. Tauc plots for allowed direct and indirect transitions of  $\text{La}_4\text{Ge}_3\text{Se}_4\text{S}_8$ .

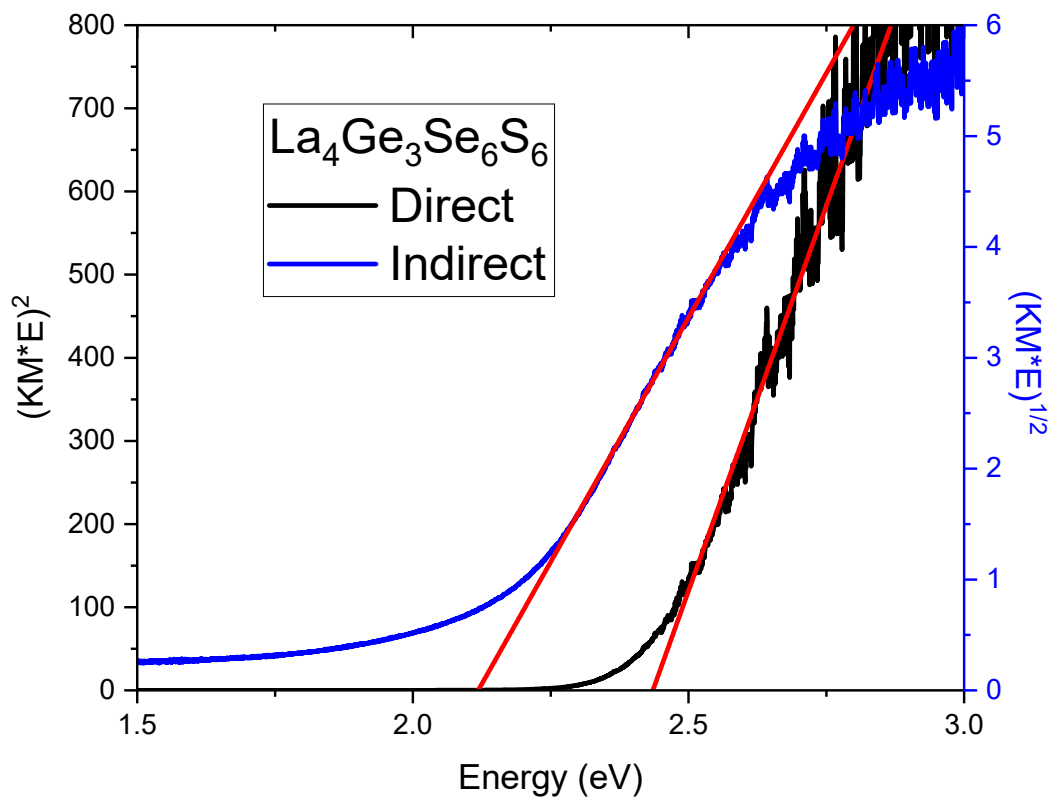

**Figure S11.** Tauc plots for allowed direct and indirect transitions of  $\text{La}_4\text{Ge}_3\text{Se}_6\text{S}_6$ .

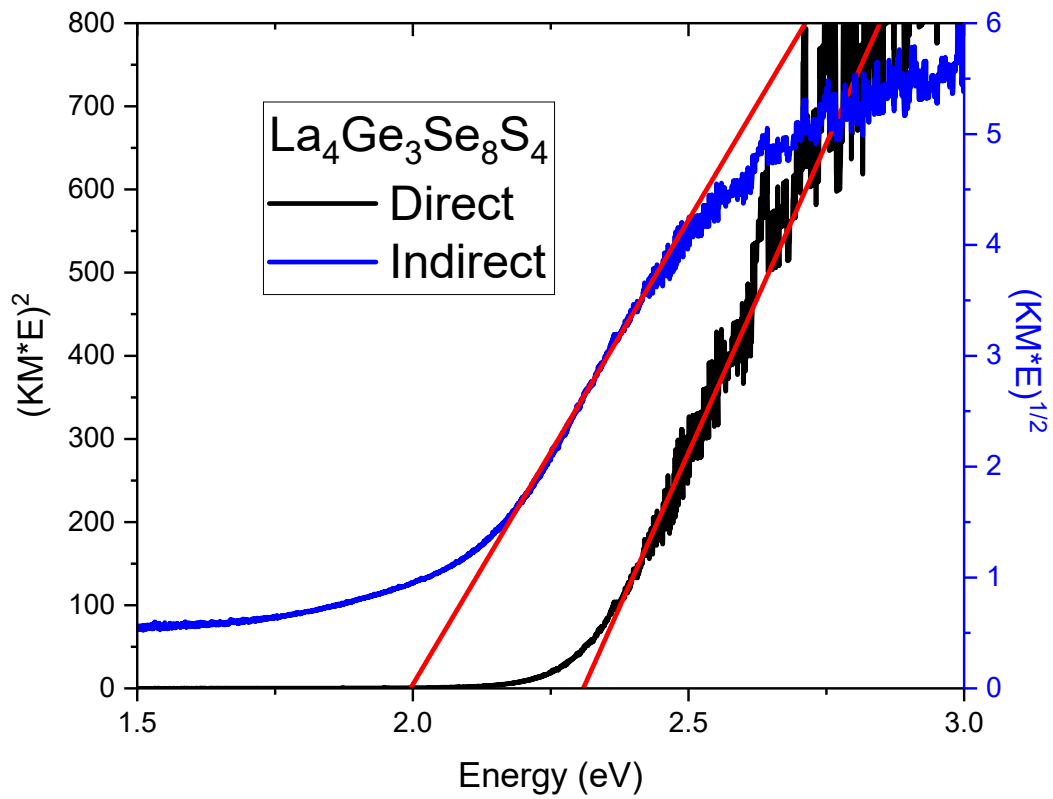

Fi

Figure S12. Tauc plots for allowed direct and indirect transitions of  $\text{La}_4\text{Ge}_3\text{Se}_8\text{S}_4$ .

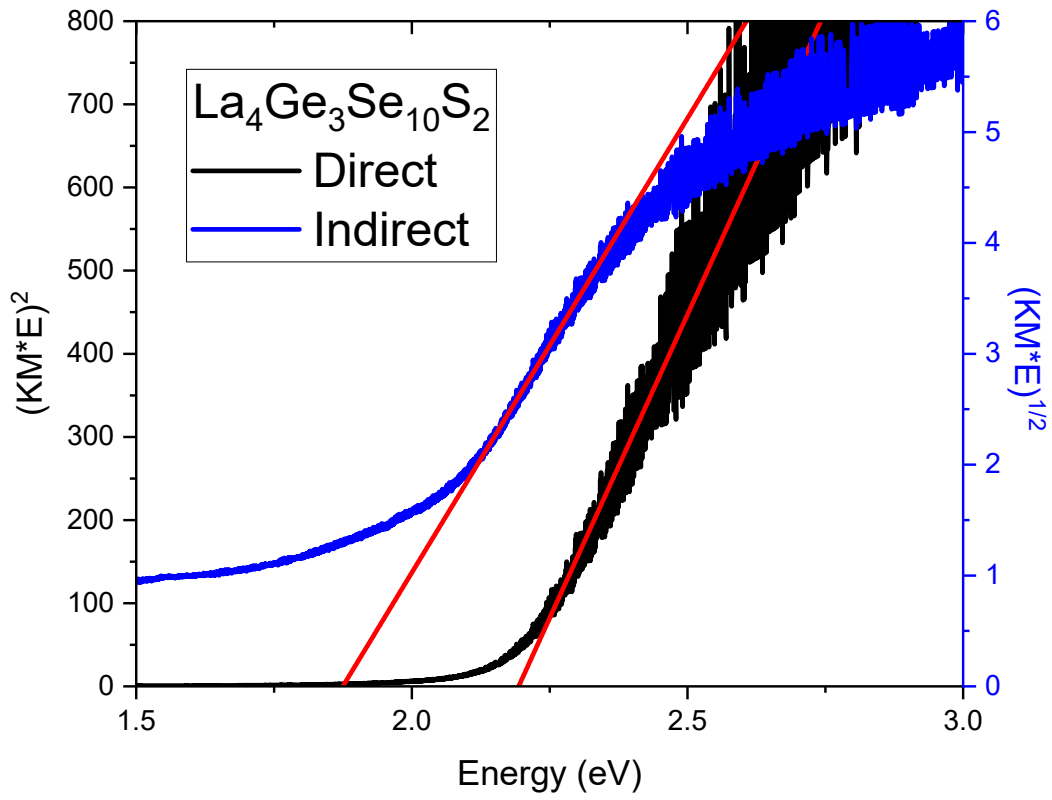

**Fi**

**Figure S13.** Tauc plots for allowed direct and indirect transitions of  $\text{La}_4\text{Ge}_3\text{Se}_{10}\text{S}_2$ .



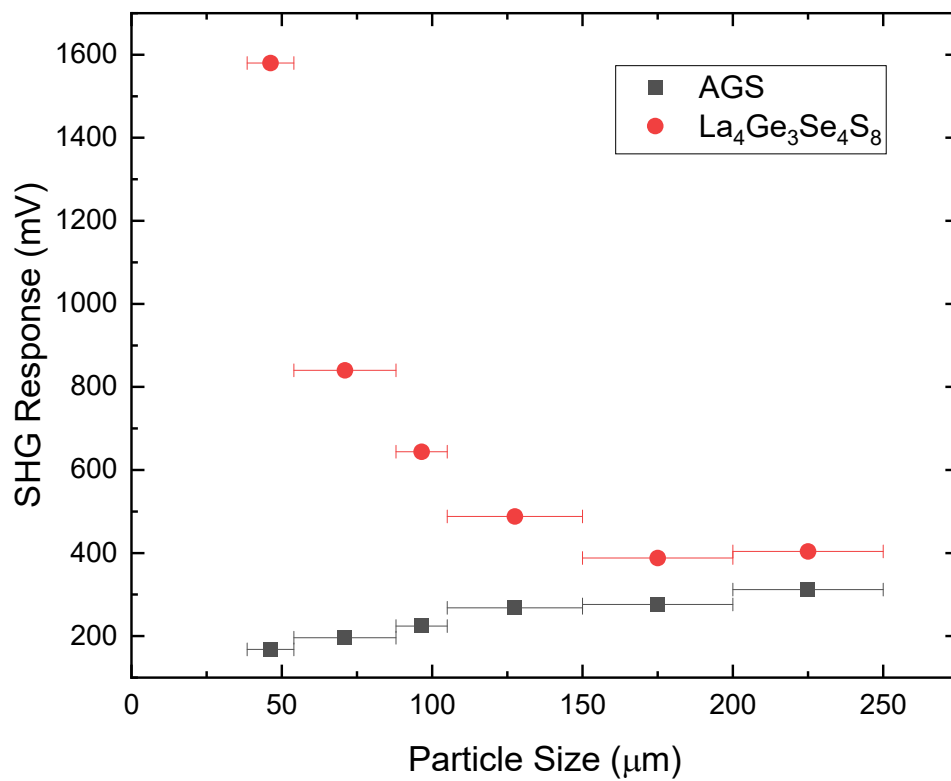

**Figure S14.** SHG intensities of La<sub>4</sub>Ge<sub>3</sub>Se<sub>4</sub>S<sub>8</sub> and AgGaS<sub>2</sub> @2.09 μm measured at variable particle size samples.

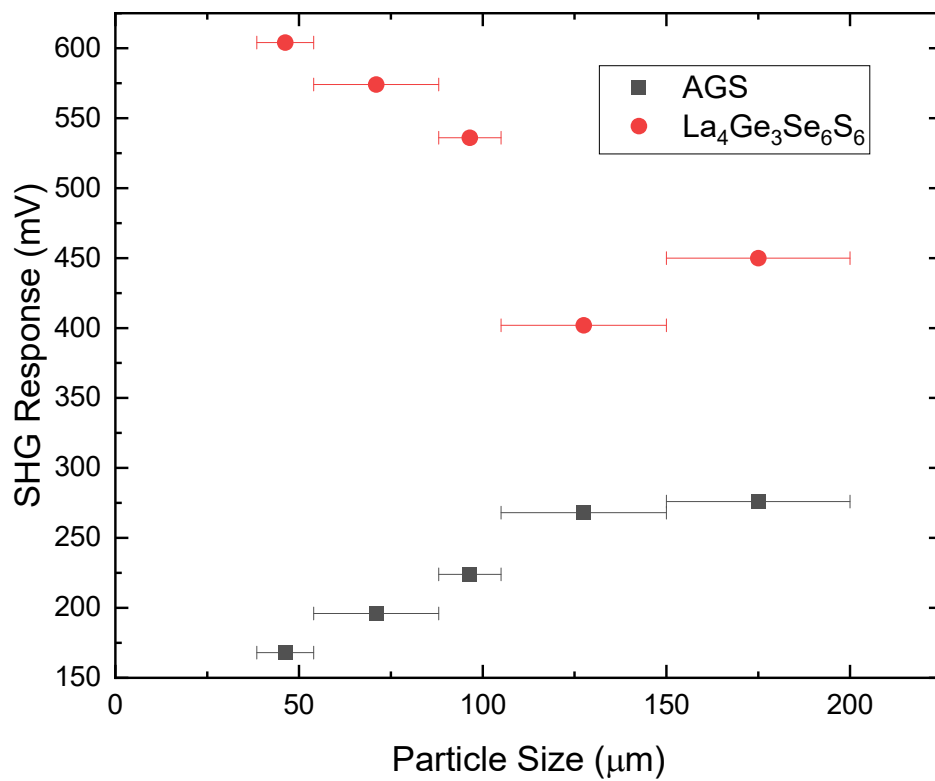

**Figure S15.** SHG intensities of La<sub>4</sub>Ge<sub>3</sub>Se<sub>6</sub>S<sub>6</sub> and AgGaS<sub>2</sub> @2.09 μm measured at variable particle size samples.

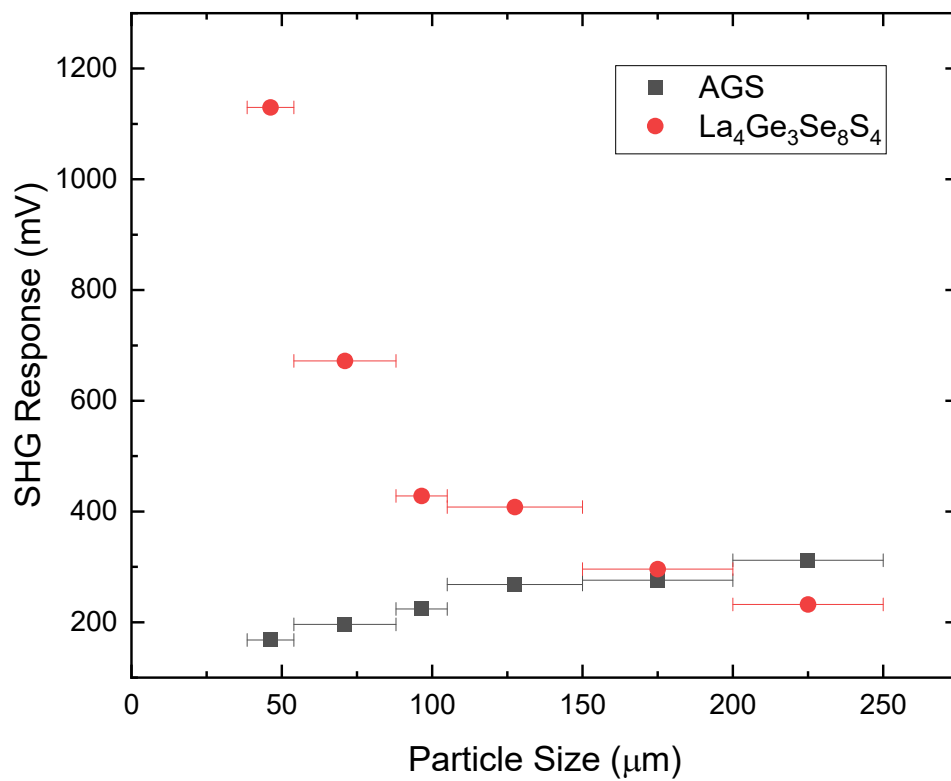

**Figure S16.** SHG intensities of La<sub>4</sub>Ge<sub>3</sub>Se<sub>8</sub>S<sub>4</sub> and AgGaS<sub>2</sub> @2.09 μm measured at variable particle size samples.

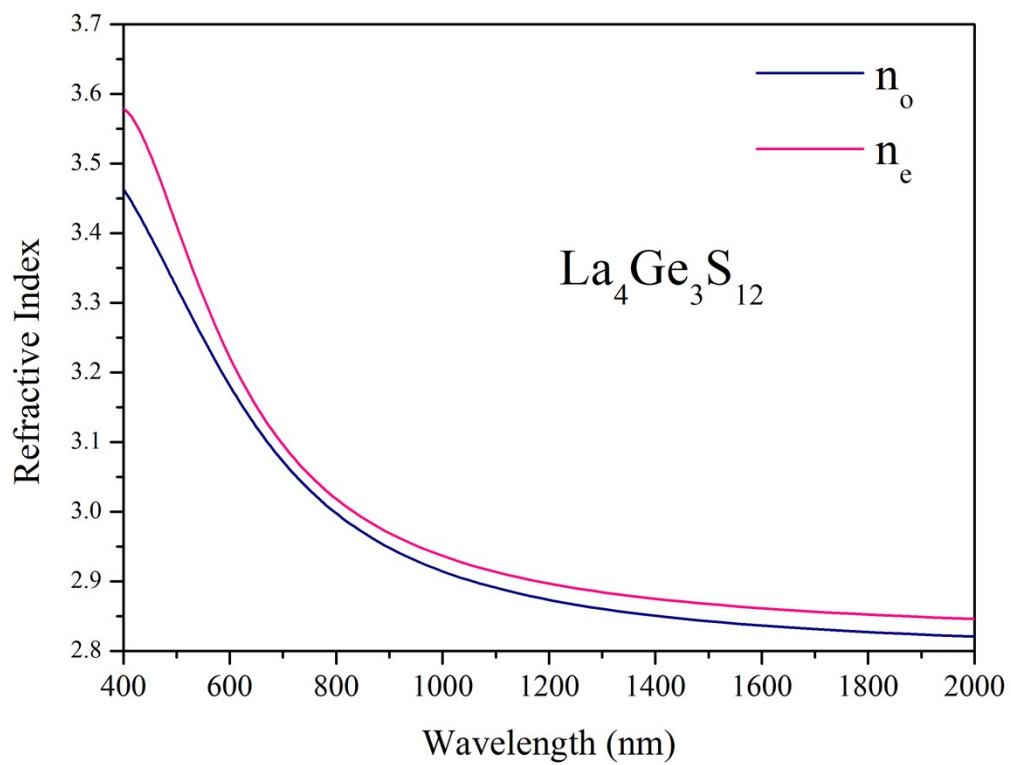

**Figure S17.** Calculated birefringence of  $\text{La}_4\text{Ge}_3\text{S}_{12}$  versus wavelength of the fundamental light.

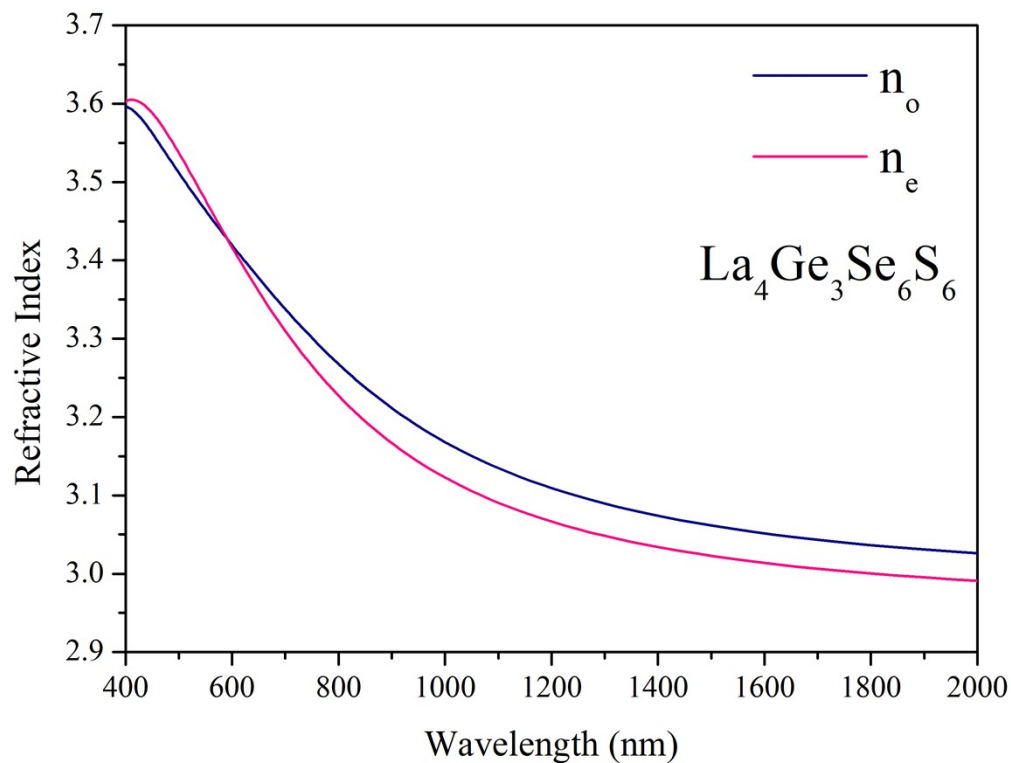

**Figure S18.** Calculated birefringence of  $\text{La}_4\text{Ge}_3\text{Se}_6\text{S}_6$  versus wavelength of the fundamental light.

**Table S4.** Results of EDX analyses of selected crystals of  $\text{La}_4\text{Ge}_3\text{Se}_2\text{S}_{10}$ ,  $\text{La}_4\text{Ge}_3\text{Se}_6\text{S}_6$ , and  $\text{La}_4\text{Ge}_3\text{Se}_{10}\text{S}_2$ .

| Spectrum | Normalized Composition                                    |
|----------|-----------------------------------------------------------|
|          | $\text{La}_{4.1}\text{Ge}_3\text{Se}_{2.2}\text{S}_{9.6}$ |

|                                                                                                                          |                                                                    |
|--------------------------------------------------------------------------------------------------------------------------|--------------------------------------------------------------------|
| 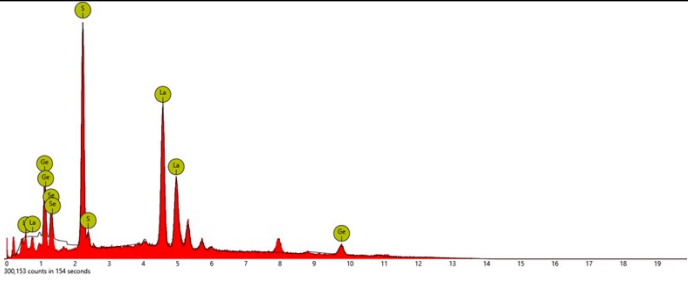 <p>200,133 counts in 154 seconds</p>   | $\text{La}_{4.0}\text{Ge}_3\text{Se}_{2.0}\text{S}_{9.1}$          |
|  <p>197,268 counts in 155 seconds</p>   | $\text{La}_{3.9}\text{Ge}_3\text{Se}_{2.1}\text{S}_{8.7}$          |
| <b>Average:</b>                                                                                                          | $\text{La}_{4.0(1)}\text{Ge}_3\text{Se}_{2.1(1)}\text{S}_{9.1(1)}$ |
|  <p>194,310 counts in 154 seconds</p>  | $\text{La}_{3.6}\text{Ge}_3\text{Se}_{6.2}\text{S}_{5.7}$          |
|  <p>405,512 counts in 154 seconds</p> | $\text{La}_{3.8}\text{Ge}_3\text{Se}_{5.6}\text{S}_{4.9}$          |
|  <p>400,439 counts in 121 seconds</p> | $\text{La}_{4.3}\text{Ge}_3\text{Se}_{6.1}\text{S}_{5.8}$          |
| <b>Average:</b>                                                                                                          | $\text{La}_{3.9(1)}\text{Ge}_3\text{Se}_{5.9(1)}\text{S}_{5.5(1)}$ |

|                                                                                                                                                                                                                                                                                                                                                                                                                                   |                                                            |
|-----------------------------------------------------------------------------------------------------------------------------------------------------------------------------------------------------------------------------------------------------------------------------------------------------------------------------------------------------------------------------------------------------------------------------------|------------------------------------------------------------|
| 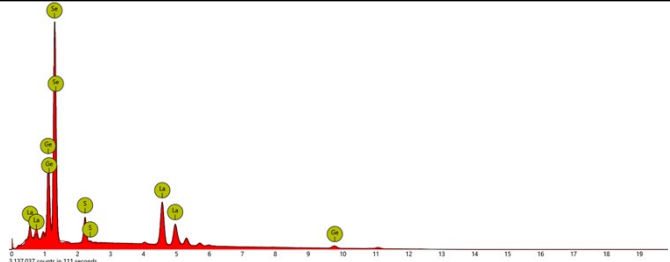 <p>EDS spectrum for <math>\text{La}_{4.6}\text{Ge}_3\text{Se}_{10.4}\text{S}_{1.6}</math>. The x-axis represents energy in keV from 0 to 19. The y-axis represents counts. Peaks are labeled with their corresponding elements: La (~0.5 keV), Ge (~1.1 keV), Se (~2.0 keV), S (~2.3 keV), Ge (~4.5 keV), La (~4.8 keV), and S (~10.0 keV).</p> | $\text{La}_{4.6}\text{Ge}_3\text{Se}_{10.4}\text{S}_{1.6}$ |
|  <p>EDS spectrum for <math>\text{La}_{4.2}\text{Ge}_3\text{Se}_{10.1}\text{S}_{1.6}</math>. The x-axis represents energy in keV from 0 to 19. The y-axis represents counts. Peaks are labeled with their corresponding elements: La (~0.5 keV), Ge (~1.1 keV), Se (~2.0 keV), S (~2.3 keV), Ge (~4.5 keV), La (~4.8 keV), and S (~10.0 keV).</p> | $\text{La}_{4.2}\text{Ge}_3\text{Se}_{10.1}\text{S}_{1.6}$ |
